# Supplementary material for: Synthesis of hollow organosiliceous spheres for volatile organic compound removal
Source: Royal Society of Chemistry journal article supplement (doi:10.1039/c4ta02899f), 2014-01-01
Supplement: c4ta02899f1.pdf [file c4ta02899f1.pdf]

Support information

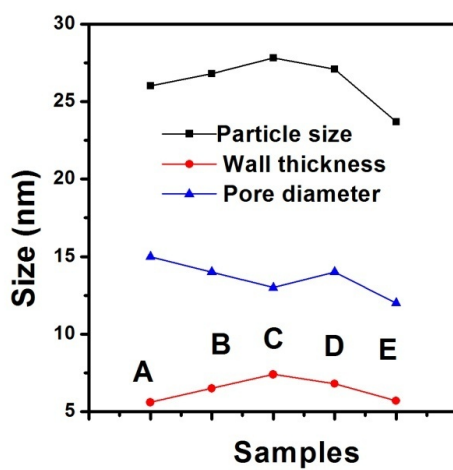

**Fig. S1** The diagram of particle size (■), wall thickness (●) and pore diameter (▲) of different HOSs. A-E is HOSs-5% (A), HOSs-10% (B), HOSs-15% (C), HOSs-20% (D) and HOSs-25% (E), respectively.

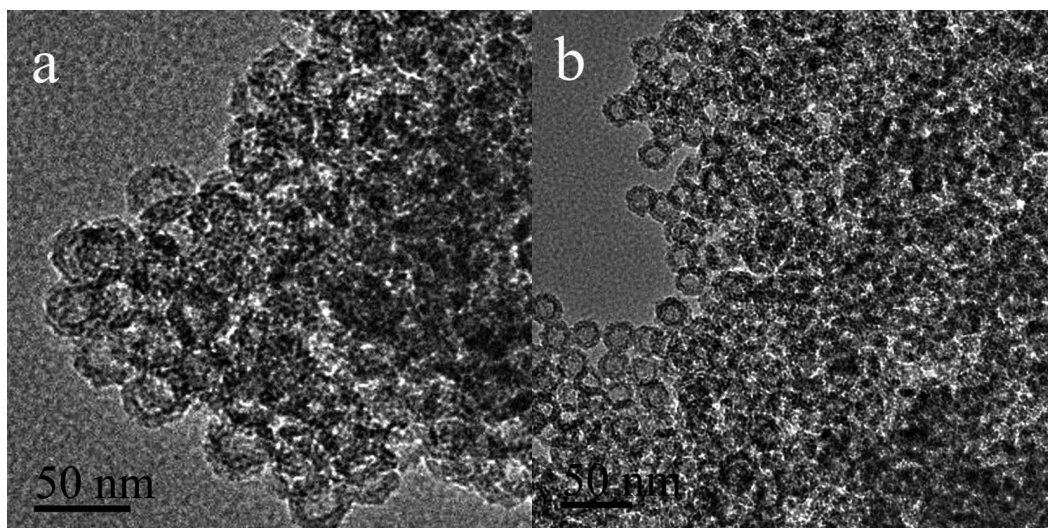

**Fig. S2** TEM images of HOSs-5% (a) and HOSs-25% (b) without DMDMOS added.

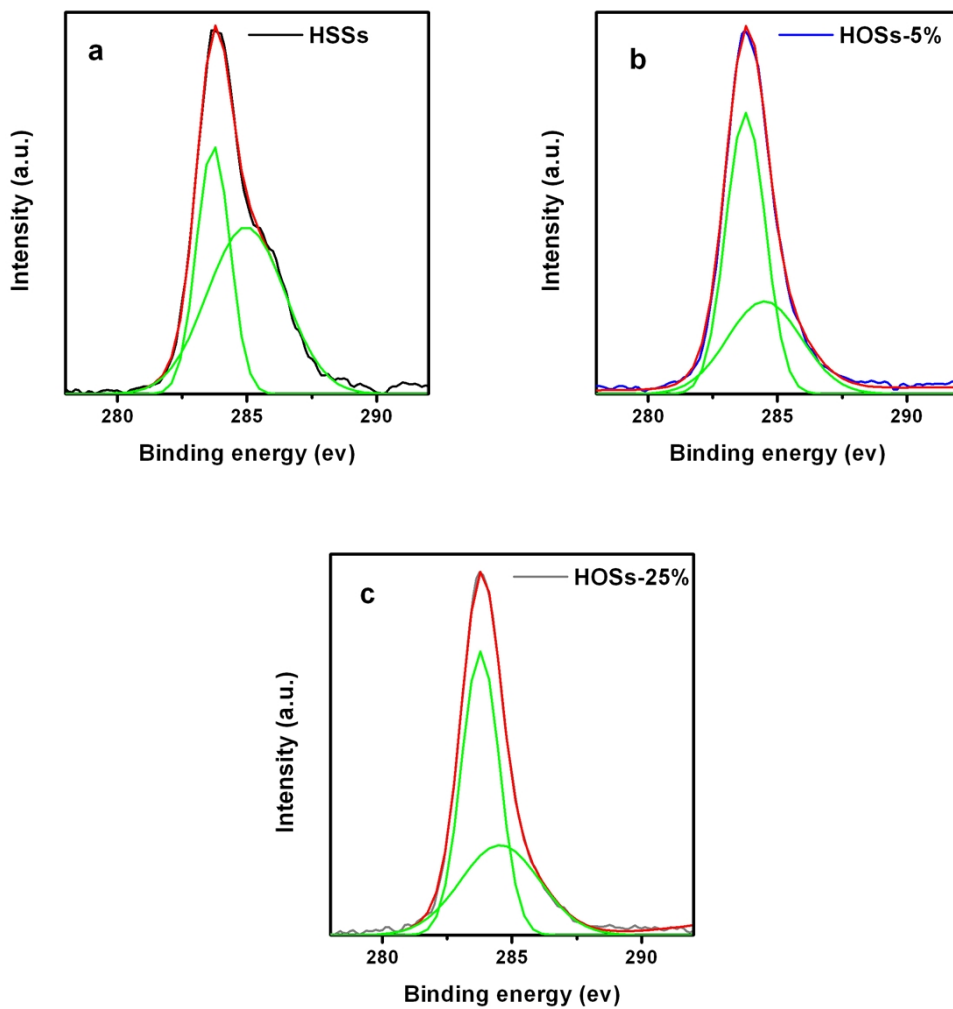

**Fig. S3** C1s XPS spectra of different hollow spheres.

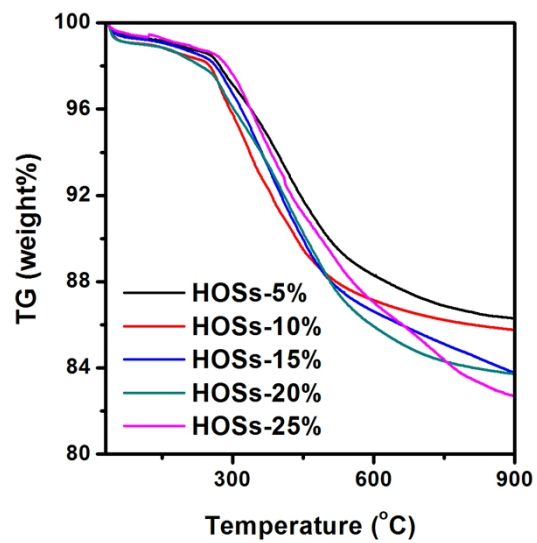

**Fig. S4** TGA profile HOSs-5% (A), HOSs-10% (B), HOSs-15% (C) HOSs-20% (D) and HOS-25% (E).

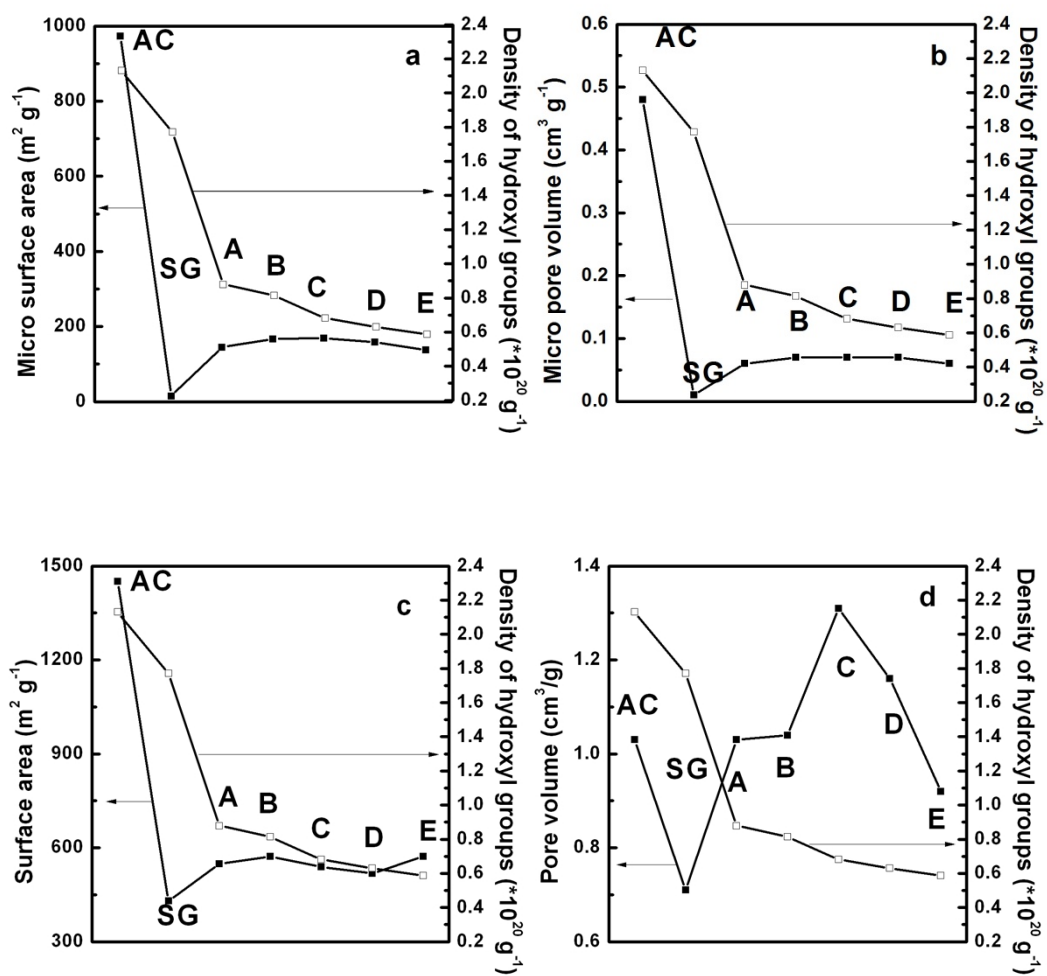

**Fig. S5** Relationship between density of surface hydroxyl group and structure parameters of different samples, micro surface area (a), micro pore volume (b), surface area (c) and pore volume (d), respectively. A-E is HOSs-5% (A), HOSs-10% (B), HOSs-15% (C), HOSs-20% (D) and HOSs-25% (E), respectively.

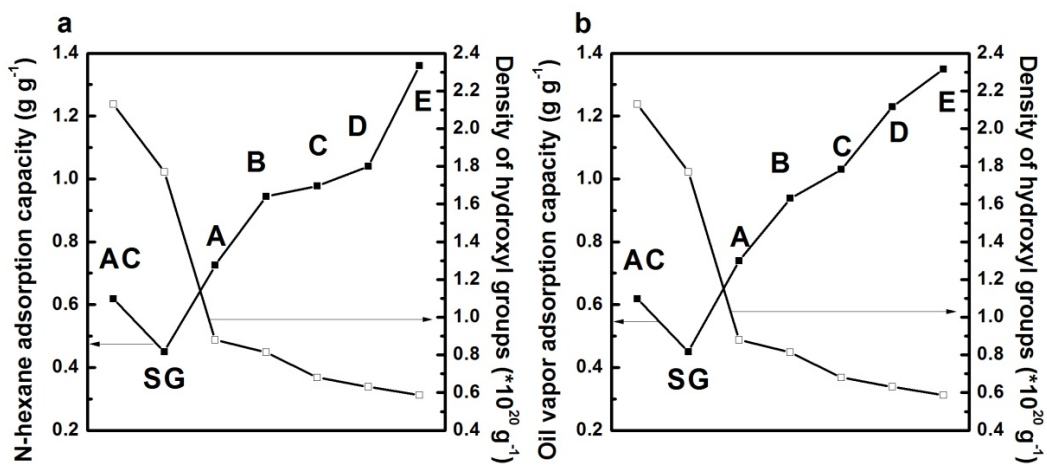

**Fig. S6** Relationship between static adsorption capacity and the density of surface hydroxyl group of different samples, n-hexane (a) and 93# gasoline (b). A-E is HOSs-5% (A), HOSs-10% (B), HOSs-15% (C), HOSs-20% (D) and HOSs-25% (E), respectively.

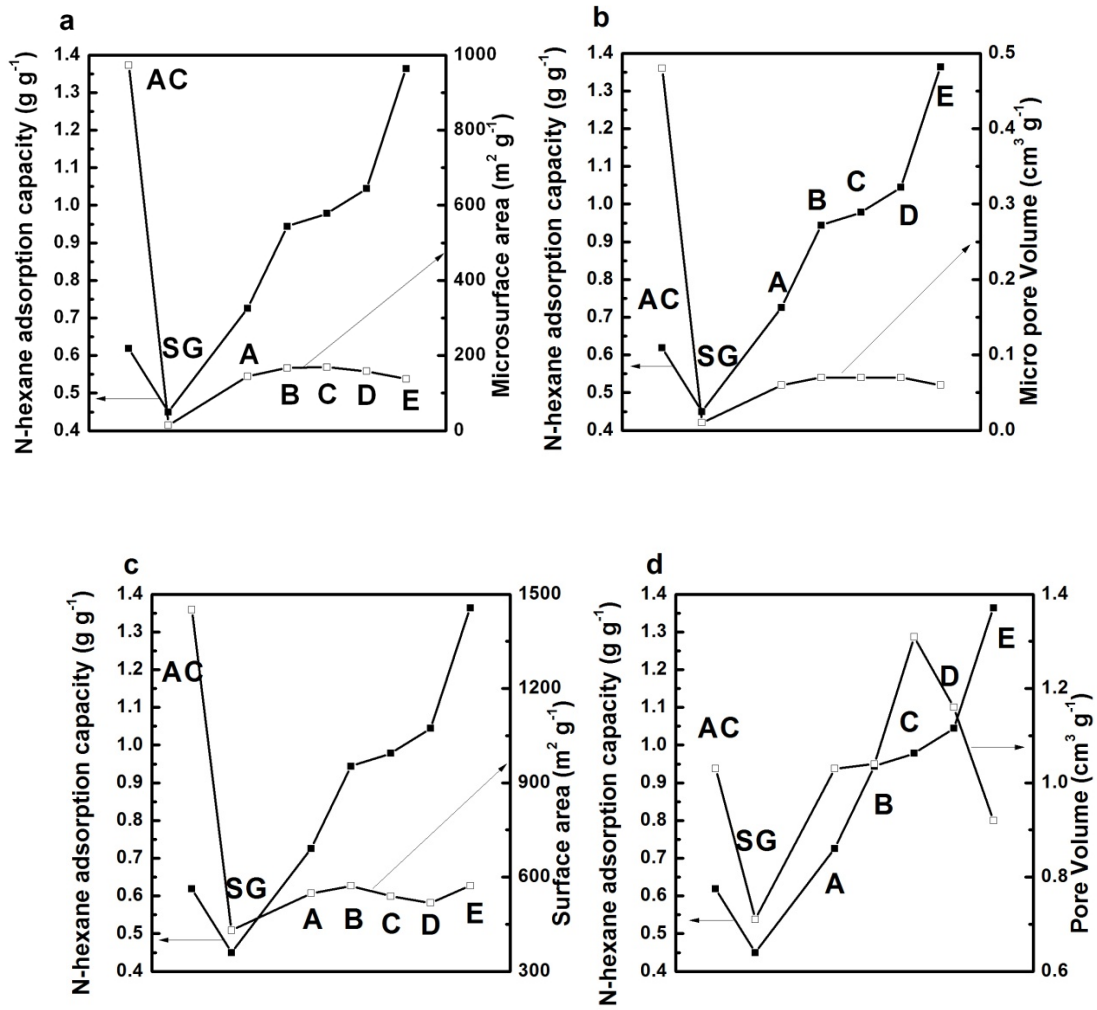

**Fig. S7** Relationship between static n-hexane adsorption capacity and structure parameters of different samples, micro surface area (a), micro pore volume (b), surface area (c) and pore volume (d), respectively. A-E is HOSs-5% (A), HOSs-10% (B), HOSs-15% (C), HOSs-20% (D) and HOSs-25% (E), respectively.

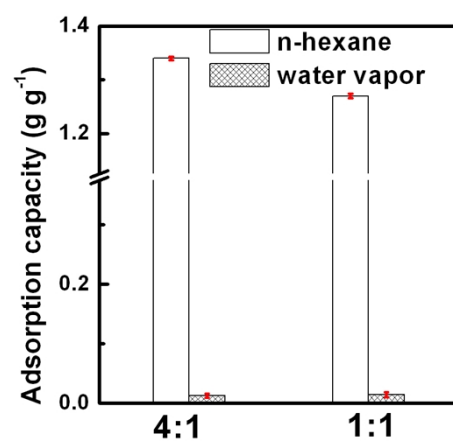

**Fig. S8** Static competitive adsorption of n-hexane and water vapor from triplicate measurements with the adsorbates of n-hexane and water volume ratio of 4:1 and 1:1.



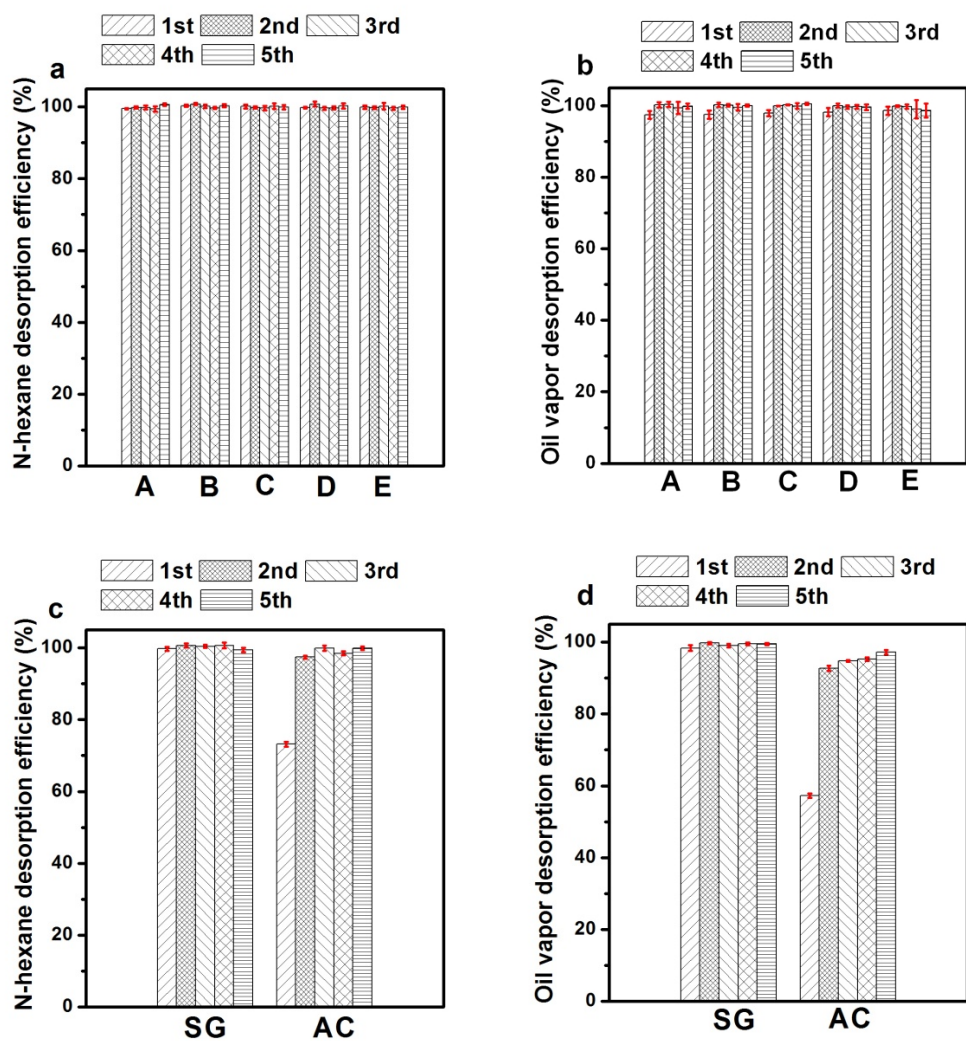

Fig. S9 The histograms of desorption efficiency from triplicate measurements for different HOSs, n-hexane (a), 93# gasoline (b), respectively and the histograms of desorption efficiency for AC and SG, n-hexane (c), 93# gasoline (d), respectively.

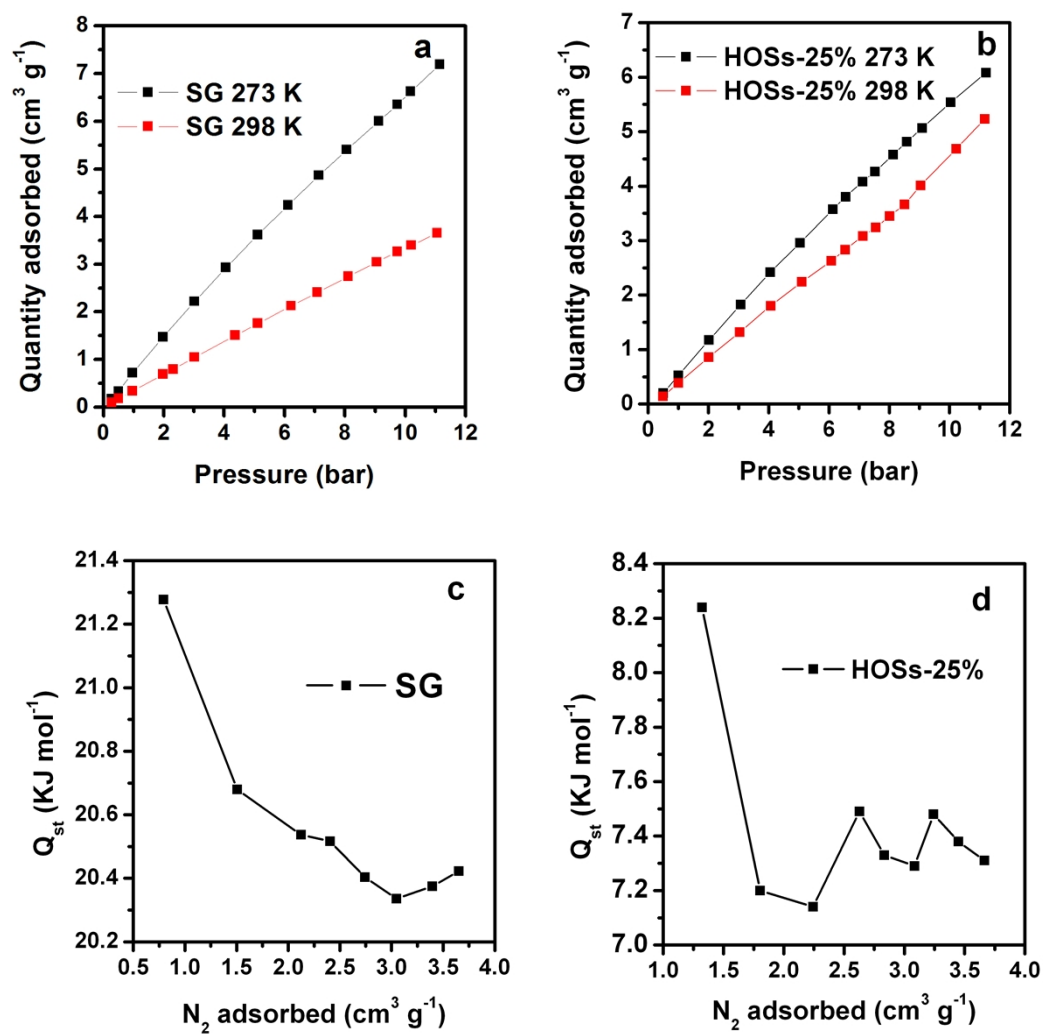

**Fig. S10**  $N_2$  sorption isotherms of SG (a) and HOS-25% (b) at 273 K and 298 K, and isosteric heats of adsorption for  $N_2$  on SG (c) and HOS-25% (d).

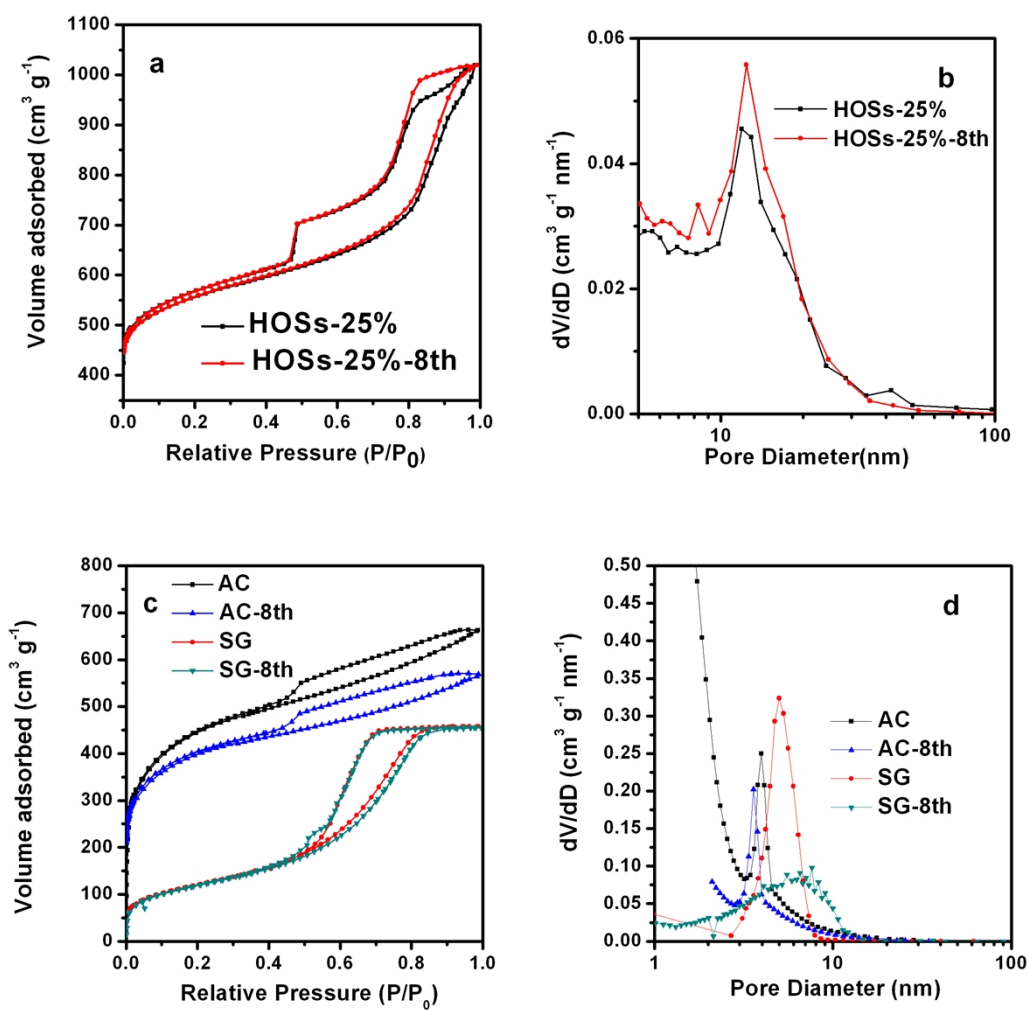

**Fig. S11** N<sub>2</sub> adsorption-desorption isotherms (a and c) and pore size distributions (b and d) of commercial AC-8th, SG-8th and HOSs-25%-8th as compared to AC, SG and HOSs-25% before adsorption.

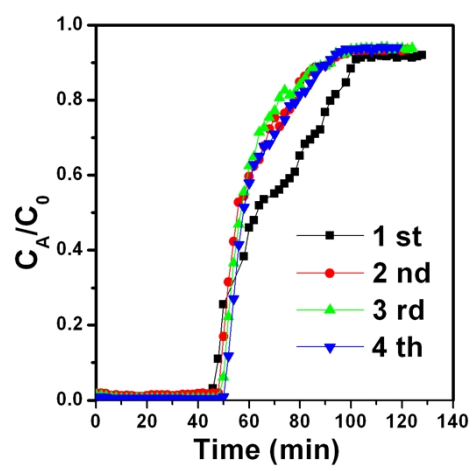

**Fig. S12** The breakthrough curves for n-hexane of HOS-25% using water-saturated carrier gas (▲) with total flow rate of  $0.135 \text{ L min}^{-1}$  and the flow rate of n-hexane of  $0.1 \text{ L min}^{-1}$ , respectively.

**Table S1** Surface chemistry composition characterized by XPS of HSSs, HOSs-5% and HOSs-25%.

| Sample   | C (at.%) | O (at.%) | Si (at.%) |
|----------|----------|----------|-----------|
| HSSs     | 28.73    | 48.16    | 23.11     |
| HOSs-5%  | 32.02    | 44.09    | 23.89     |
| HOSs-25% | 30.30    | 45.49    | 24.21     |

Table S2 The static n-hexane adsorption capacity, theoretically calculated weight of SiO<sub>2</sub> and organo groups (CH<sub>2</sub> and CH<sub>3</sub> fragments) for different HOSs, and theoretically calculated and measured weight ratio of organo groups from TGA results.

| Samples  | a (g g <sup>-1</sup> ) | b (g) | c (g) | d (%) | e (%) |
|----------|------------------------|-------|-------|-------|-------|
| HOSs-5%  | 0.726                  | 0.552 | 0.132 | 19.2  | 11.4  |
| HOSs-10% | 0.944                  | 0.567 | 0.138 | 19.6  | 12.0  |
| HOSs-15% | 0.978                  | 0.581 | 0.145 | 20.0  | 13.5  |
| HOSs-20% | 1.04                   | 0.596 | 0.152 | 20.3  | 13.9  |
| HOSs-25% | 1.36                   | 0.616 | 0.159 | 20.7  | 15.1  |

Note: a is the static n-hexane adsorption capacity; b and c are theoretically calculated weight of SiO<sub>2</sub> and organo groups, respectively; d and e is theoretically calculated and measured weight ratio of organo groups from TGA results, respectively.

It is assumed that all the silica sources are consumed in the synthesis and form the silica framework of the HOSs, and HOSs-5% was taken as an example to show the detail the calculation process.

The initial composition of the silica sources of is TEOS ( $4.57 \times 10^{-3}$  mol), BTSE ( $2.40 \times 10^{-4}$  mol), and DMDMOS ( $4.17 \times 10^{-3}$  mol). The total mole of Si is  $4.57 \times 10^{-3} + 2.40 \times 10^{-4} \times 2 + 4.17 \times 10^{-3} = 9.22 \times 10^{-3}$ , so the final weight of SiO<sub>2</sub> is  $9.22 \times 10^{-3} \times 60 = 0.552$  g. The mole of C in BTSE is  $2.40 \times 10^{-4} \times 2 = 4.80 \times 10^{-4}$ , and the mole of C in DMDMOS is  $8.34 \times 10^{-3}$ . The total C and H element weight is  $4.80 \times 10^{-4} \times 14 + 8.34 \times 10^{-3} \times 15 = 0.132$  g. So the weight percent of CH<sub>2</sub> and CH<sub>3</sub> is  $0.132 / (0.132 + 0.552) = 19.2\%$ .

**Table S3** The n-hexane adsorption (Ad) capacities and desorption (De) efficiencies of triplicate static adsorption experiments (5 adsorption-desorption cycles).

| Cycle<br>Exp | 1 st                        | 1 st      | 2 nd                       | 2 nd      | 3 rd                       | 3 rd      | 4 th                       | 4 th      | 5 th                       | 5 th      |
|--------------|-----------------------------|-----------|----------------------------|-----------|----------------------------|-----------|----------------------------|-----------|----------------------------|-----------|
|              | Ad.<br>(g g <sup>-1</sup> ) | De<br>(%) | Ad<br>(g g <sup>-1</sup> ) | De<br>(%) |
| 1            | 1.3551                      | 99.70     | 1.3762                     | 99.65     | 1.3819                     | 99.89     | 1.3559                     | 100.1     | 1.3701                     | 99.74     |
| 2            | 1.3516                      | 100.5     | 1.3715                     | 99.86     | 1.3796                     | 100.3     | 1.3621                     | 99.83     | 1.3613                     | 99.91     |
| 3            | 1.3583                      | 99.70     | 1.3711                     | 100.3     | 1.3874                     | 99.59     | 1.3634                     | 99.53     | 1.3808                     | 99.18     |
| Ave          | 1.355                       | 99.97     | 1.373                      | 99.94     | 1.382                      | 99.92     | 1.360                      | 99.82     | 1.371                      | 99.61     |
| STD          | 0.0034                      | 0.46      | 0.0028                     | 0.33      | 0.0040                     | 0.35      | 0.0040                     | 0.29      | 0.0098                     | 0.38      |

**Note:** Due to the mass loss of the sample, the percentage of desorption might be higher than 100%. Ave means average, STD stands for standard derivation.

**Table S4** Structural parameters of the different samples, before adsorption and after the 8th dynamic adsorption-desorption cycle.

| Samples     | $S_{\text{BET}}$<br>( $\text{m}^2 \text{g}^{-1}$ ) | $S_{\text{m}}$<br>( $\text{m}^2 \text{g}^{-1}$ ) | $V_{\text{t}}$<br>( $\text{cm}^3 \text{g}^{-1}$ ) | $V_{\text{m}}$<br>( $\text{cm}^3 \text{g}^{-1}$ ) |
|-------------|----------------------------------------------------|--------------------------------------------------|---------------------------------------------------|---------------------------------------------------|
| AC          | 1451                                               | 973                                              | 1.03                                              | 0.48                                              |
| AC-8th      | 999                                                | 366                                              | 0.72                                              | 0.18                                              |
| SG          | 430                                                | 15                                               | 0.71                                              | 0.01                                              |
| SG-8th      | 427                                                | 16                                               | 0.70                                              | 0.01                                              |
| HOSs-25     | 572                                                | 138                                              | 0.92                                              | 0.06                                              |
| HOSs-25-8th | 576                                                | 126                                              | 0.96                                              | 0.05                                              |



**Table S5** Comparison of dynamic adsorption parameters of n-hexane on HOSs-25% using water-saturated carrier gas between 4 times.

| HOSs-25% | Breakthrough time (min) | $t_e$ (min) | $q_t$ (g g <sup>-1</sup> adsorbent) | $q_{n\text{-hexane}}$ (g g <sup>-1</sup> adsorbent) | $q_t$ (g g <sup>-1</sup> adsorbent) | $q_{\text{water}}$ (g g <sup>-1</sup> adsorbent) | $q_{n\text{-hexane}} / q_{\text{water}}$ | Desorption efficiency (%) |
|----------|-------------------------|-------------|-------------------------------------|-----------------------------------------------------|-------------------------------------|--------------------------------------------------|------------------------------------------|---------------------------|
| 1st      | 48                      | 104         | 1.43                                | 1.41                                                | 1.43                                | 0.0231                                           | 61.3                                     | 98.6                      |
| 2nd      | 50                      | 102         | 1.39                                | 1.37                                                | 1.39                                | 0.0191                                           | 72.1                                     | 99.2                      |
| 3rd      | 50                      | 102         | 1.42                                | 1.40                                                | 1.42                                | 0.0179                                           | 77.8                                     | 98.9                      |
| 4th      | 52                      | 100         | 1.44                                | 1.42                                                | 1.44                                | 0.0180                                           | 78.8                                     | 99.4                      |
